# Supplementary material for: Hydroxytyrosol improves strenuous exercise-associated cardiac pathological changesviamodulation of mitochondrial homeostasis
Source: Royal Society of Chemistry journal article supplement (doi:10.1039/d2fo00839d), 2022-01-01
Supplement: d2fo00839d1.pdf [file d2fo00839d1.pdf]

### Supplementary materials

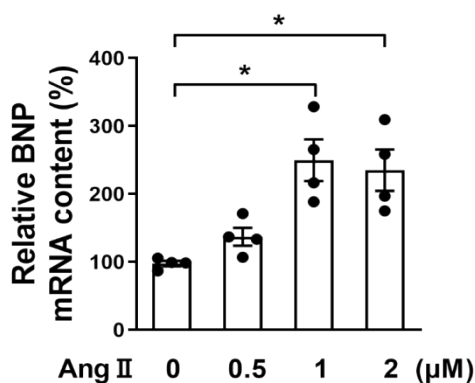

**Figure S1 BNP mRNA level in 0, 0.5, 1 and 2 μM Ang II -treated H9C2 cells.** The values are the means ± S.E.M. (n=4). \*p<0.05.

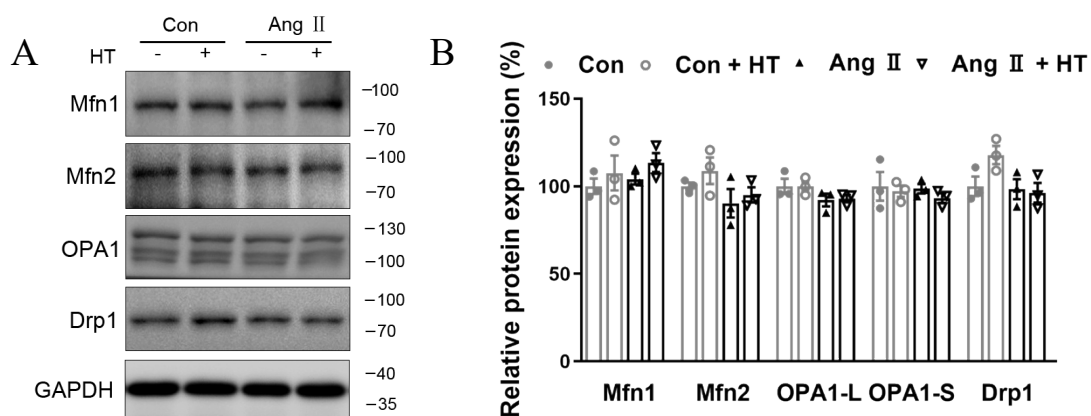

**Figure S2 Mitochondrial dynamic-related proteins expression in Ang II-treated H9C2 cells.** Con, control; Con+HT, control+10 μM HT treatment; Ang II, 1 μM Ang II treatment; Ang II+HT, 1 μM Ang II plus 10 μM HT treatment. (A) Western blot images of Mfn1, Mfn2, OPA1 and Drp1. (B) Statistical analysis of Mfn1, Mfn2, OPA1 and Drp1. The values are the means ± S.E.M. (n=3).

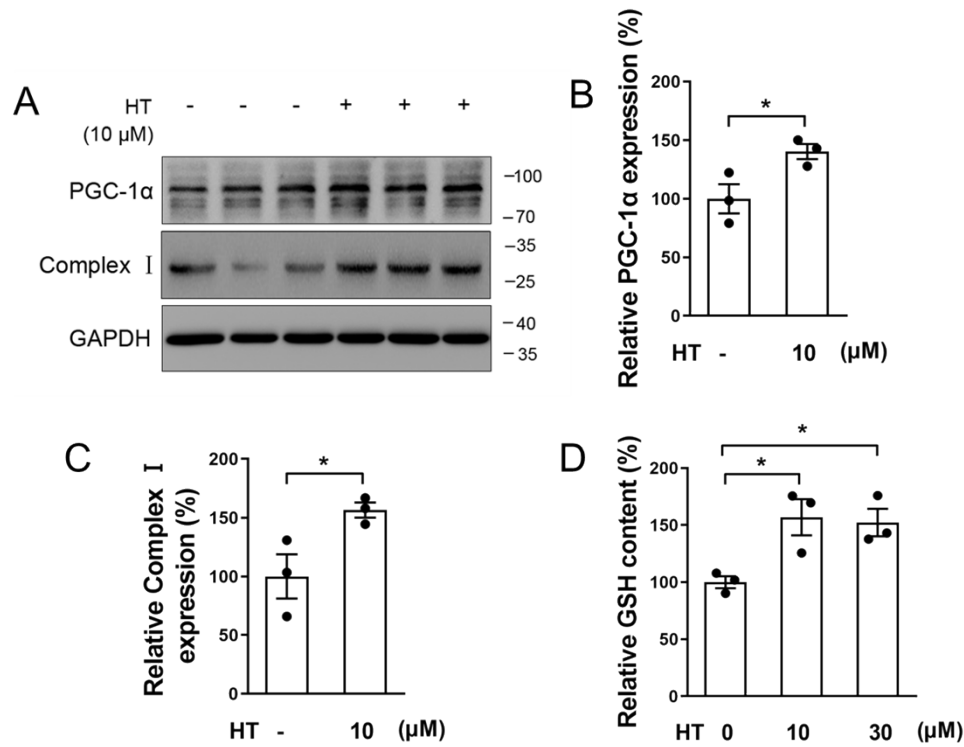

**Figure S3 Protein expression of PGC-1 $\alpha$  and Complex I and level of GSH in HT-treated H9C2 cells.** (A) Western blot images of PGC-1 $\alpha$  and Complex I. (B) Statistical analysis of PGC-1 $\alpha$ . (C) Statistical analysis of Complex I. (D) Relative GSH level. The values are the means  $\pm$  S.E.M. (n=3).

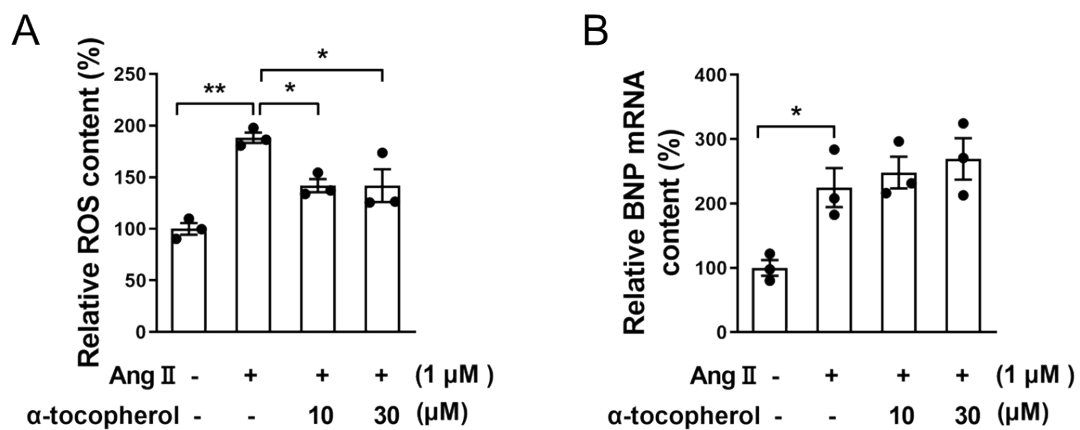

**Figure S4  $\alpha$ -tocopherol effectively reduced ROS level but failed to decrease BNP mRNA level in Ang II-treated H9C2 cells.** (A) Relative ROS level. (B) Relative BNP mRNA level.
